1 **The PASTA domains of *Bacillus subtilis* PBP2B stabilize the interaction of PBP2B with**  
2 **DivIB**

3

4 Danae Morales Angeles<sup>1</sup>, Alicia Macia-Valero, Laura C. Bohorquez<sup>1</sup>, Dirk-Jan Scheffers\*

5

6 Department of Molecular Microbiology, Groningen Biomolecular Sciences and Biotechnology

7 Institute, University of Groningen, The Netherlands.

8 <sup>1</sup>Current address: DMA: Faculty of Chemistry, Biotechnology and Food Science, Norwegian

9 University of Life Sciences, 1432, Ås, Norway; LCB: BluSense Diagnostics ApS, Carrera 63

10 100-49. 111121. Bogota, Colombia

11

12 \* Corresponding author: Address: D.J. Scheffers, Molecular Microbiology, GBB, University

13 of Groningen, Nijenborgh 7, 9747 AG Groningen, the Netherlands. E-mail:

14 d.j.scheffers@rug.nl; Fax: +31-50-3632154; Tel: +31-50-3632319

15

16 ORCID: DMA: <https://orcid.org/0000-0003-3749-1387>; LCB: [17 \[2716-0170\]\(https://orcid.org/0000-0003-2716-0170\); DJS: <https://orcid.org/0000-0002-9439-9168>](https://orcid.org/0000-0003-</a></p></div><div data-bbox=)

18

19 Keywords: Peptidoglycan, cell division, divisome, Penicillin Binding Protein, Bacterial Two

20 Hybrid.

21

22

## 23 **Abstract**

24 Bacterial cell division is mediated by a protein complex known as the divisome. Many protein-  
25 protein interactions in the divisome have been characterized. In this report, we analyse the role  
26 of the PASTA (Penicillin binding protein And Serine Threonine kinase Associated)-domains  
27 of *Bacillus subtilis* PBP2B. PBP2B itself is essential and cannot be deleted, but removing the  
28 PBP2B PASTA domains results in impaired cell division and a heat sensitive phenotype. This  
29 resembles the deletion of *divIB*, a known interaction partner of PBP2B. Bacterial two hybrid  
30 and co-immunoprecipitation analyses show that the interaction between PBP2B and DivIB is  
31 weakened when the PBP2B PASTA domains are removed. Combined, our results show that  
32 the PBP2B PASTA domains are required to stabilize the interaction between PBP2B and  
33 DivIB.

34

## 35 **Introduction**

36 The synthesis of peptidoglycan during cell division is essential for the completion of division  
37 and in fact considered one of the drivers for constriction itself (1, 2). Cell division is mediated  
38 by a complex of proteins collectively known as the divisome. In most bacteria, the divisome  
39 contains two division specific peptidoglycan synthesis proteins, FtsW, a protein from the  
40 SEDS-family with glycosyl transferase activity, and a division specific Class B Penicillin  
41 Binding Protein (bPBP) with transpeptidase activity (3, 4). In *Bacillus subtilis*, these proteins  
42 are FtsW and PBP2B, which are both essential (5, 6). Interestingly, recent work from our lab  
43 and of Daniel and colleagues has shown that it is the presence of PBP2B that is essential, rather  
44 than its transpeptidase activity, suggesting that the function of PBP2B is a scaffolding one (7,  
45 8). This was similar to a previous report on the *Streptococcus pneumoniae* homologue PBP2x,  
46 of which the transpeptidase activity is also not essential (9). Both PBPs contain PASTA  
47 domains at their C-terminus. PASTA – for Penicillin binding protein And Serine Threonine

48 kinase Associated - domains are exclusively found in Gram-positive bacteria, in some high  
49 molecular weight PBPs and in eukaryotic-like serine/threonine kinases (eSTKs) (10). These  
50 domains, which contain 60-70 amino acids, have a characteristic secondary structure which  
51 consists of three  $\beta$  strands and a  $\alpha$  helix; the first and the second  $\beta$  strands are connected by a  
52 loop, but the sequence of the domain is not well conserved. PASTA domains can be present as  
53 a single or multiple copies in proteins. In PBP2x, loss of the PASTA domains abolishes the  
54 binding of Bocillin-FL, a fluorescent penicillin derivative (11) and localization of PBP2x to  
55 the division site (9), suggesting that PASTA domains mediate the interaction with  
56 peptidoglycan. This was nicely illustrated recently by a series of crystal structures that revealed  
57 that the PBP2x PASTA domains form an allosteric binding site for a pentapeptide stem in a  
58 nascent peptidoglycan strand, which positions another peptide stem on the same strand in the  
59 active site so that it can be cross-linked (12). The allosteric binding site is formed at the  
60 interface of the two PASTA domains and the transpeptidase domain and comprises the entire  
61 first and part of the second PASTA domain. Binding of the terminal D-Ala-D-Ala of the  
62 stempeptide at this site displaces a 'gatekeeper' Arginine residue on the transpeptidase  
63 domain, which subsequently forms salt bridges with an Aspartate and a Glutamate residue on  
64 the first PASTA domain which opens up the active site so that the donor stempeptide for  
65 transpeptidation on the same glycan strand can bind (12). The PASTA domains of *B. subtilis*  
66 PBP2B lack all the residues required for this allosteric activation.

67 Not all PASTA-domain containing proteins bind peptidoglycan (13). Bioinformatics analyses  
68 revealed a key difference between PASTA domains that bind peptidoglycan and PASTA  
69 domains from proteins that don't – in a residue that determines the flexibility of the “putative  
70 binding pocket”, a conserved region localized at the end of the  $\beta$  strand. Binder PASTA  
71 domains have an Arginine or a Glutamate residue at this position, while non-binders have a  
72 Proline (13). An example of this is *B. subtilis* PrkC, which functions as a peptidoglycan

73 fragment sensor that induces spore germination (14), in which mutation of this Arginine  
74 abolishes peptidoglycan binding (15). PBP2B has Prolines at both sites in its PASTA domains.  
75 Thus, PBP2B does not have residues associated with peptidoglycan binding by its individual  
76 PASTA domains nor with an allosteric site formed between the PASTA domain and the  
77 transpeptidase domain. Combined with our previous observation that deletion of the PBP2B  
78 PASTA domains does not affect localization or binding of Bocillin-FL (7) this suggests that  
79 the PASTA domains of PBP2B have a different function than peptidoglycan binding.  
80 Other reported functions for PASTA domains include protein localization and kinase activation  
81 (16). In *S. pneumoniae* StkP, which contains 4 PASTA domains, the 4<sup>th</sup> domain is critical for  
82 localization through interaction with the peptidoglycan hydrolase LytB, whereas the first three  
83 PASTA domains function as a ruler that positions the 4<sup>th</sup> domain to control cell wall thickness  
84 (17).  
85 In this paper, we have further investigated the role of the PASTA domains of PBP2B and show  
86 that these domains strengthen the interaction between PBP2B and the divisome protein DivIB.  
87 This interaction becomes critical when cells are grown at higher temperatures.

88

## 89 **Methods**

### 90 *Strains and media*

91 Strains used in this study are listed in Table 1. All *Bacillus* strains were grown in casein  
92 hydrolysate (CH)-medium at 30°C unless other conditions are specified. When necessary  
93 kanamycin (5 µg/ml) and spectinomycin (50 µg/ml) were added. To induce the expression of  
94 genes under control of the P<sub>spac</sub> and P<sub>xy1</sub> promoters, either isopropyl β-D-1-  
95 thiogalactopyranoside (IPTG) (0.5 mM) or xylose (0.2% w/v) were added to the medium.

### 96 *Construction of PBP2B chimeras*

97 Chimeras (Figure S1) were constructed using restriction free cloning (18). Hybrid primers were  
98 used to amplify *prkC* and *spoVD* regions coding for PASTA domains from chromosomal DNA  
99 of *B. subtilis*. The hybrid primers were designed using <http://www.rf-cloning.org/>, primers  
100 (Table S1) contain complementary sequences to *prkC* or *spoVD* and plasmids pDMA002 or  
101 pDMA007. A first PCR was performed using the hybrid primers to create a mega-primer which  
102 contains *prkC* or *spoVD* PASTA domains flanked by complementary sequences of pDMA002  
103 or pDMA007. The mega-primers were used in a second PCR to replace the *pbpB* PASTA  
104 domains from pDMA002 or pDMA007 with *prkC* or *spoVD* PASTA domains. *DpnI* was  
105 added to the products obtained in the second PCR in order to degrade the original plasmid.  
106 After digestion, the PCR products were used to transform *E. coli* DH5 $\alpha$  cells. Resulting  
107 plasmids (Table 2) were sequenced and cloned into *amyE* locus of *B. subtilis* 3295. Integration  
108 into the *amyE* locus was verified by growing the transformants on starch plates.

#### 109 *Growth curves*

110 Strains were grown overnight in the presence of kanamycin (5  $\mu$ g/ml) and spectinomycin (50  
111  $\mu$ g/ml) when necessary. IPTG was added to the medium to express wild-type *pbpB* and to  
112 ensure the proper growth of all strains before performing the growth curves. The following  
113 day, the strains were diluted to an OD<sub>600</sub> 0.05 and grown until early exponential phase. Next,  
114 cells were washed CH-medium to remove the IPTG. Cells were diluted to an OD<sub>600</sub> 0.001 in  
115 CH-medium containing 0.2% (w/v) xylose to express PBP2B, PBP2B- $\Delta$ PASTA or PBP2B  
116 chimeras. 200  $\mu$ l of culture (in triplicate), of each condition to test, was loaded in a 96-well  
117 plate. The cultures were grown at 30 or 48  $^{\circ}$ C, OD<sub>600</sub> was measured every 10 minutes and  
118 recorded using a Powerwave 340 (Biotek).

#### 119 *Microscopy*

120 Cells were grown until exponential phase. Nile red (Sigma) (5 $\mu$ g/ml) and 4',6-diamidino-2-  
121 phenylindole (Sigma) (DAPI) (1  $\mu$ g/ml) were used to stain membranes and DNA, respectively.

122 Cells were spotted on agarose (1% w/v in PBS) pads and imaged using a Nikon Ti-E  
123 microscope (Nikon Instruments, Tokyo, Japan) equipped with a Hamamatsu Orca Flash4.0  
124 camera. Image analysis was performed using the software packages ImageJ  
125 (<http://rsb.info.nih.gov/ij/>), ObjectJ (<https://sils.fnwi.uva.nl/bcb/objectj/index.html>),  
126 ChainTracer (19) and Adobe Photoshop (Adobe Systems Inc., San Jose, CA, USA). Box plots  
127 were generated using BoxPlotR (<http://shiny.chemgrid.org/boxplotr/>). All quantitative results  
128 were derived from at least two biological replicate experiments.

### 129 *Protein stability*

130 Membranes from strains 4132 and 4133 grown at 30°C on CH with 0.2% (w/v) xylose were  
131 isolated. Cells were grown until exponential phase and spun down (3 000 rpm, 7 min, 4 °C).  
132 Pellets were washed in PBS and then cells were lysed by sonication. Membranes were collected  
133 by centrifugation (45,000 rpm, 4°C, 50 min) and resuspended in PBS. The protein  
134 concentration was equalised for the two strain samples and aliquots of membrane material of  
135 the same volume were prepared. Aliquots were incubated at 30 or 48 °C for 5 min, 20 min, 1  
136 hr, 2 hr and 14 hr. Then, Bocillin 650/665 (5 µg/ml) was added to each sample, and samples  
137 were further incubated at RT for 10 min. After incubation, sample buffer was added to each  
138 sample to stop further protein degradation, and samples were run in SDS (10 %) gel. GFP and  
139 Bocillin were detected using a Typhoon FLA950 (GE Healthcare). For GFP, the 473 nm laser  
140 and the LPB (Long Pass Blue) filter were used, and for Bocillin the 635 nm laser and the LPR  
141 (Long Pass Red) were used.

142 After imaging, the same gels were used for immunoblotting. Proteins were transferred to a  
143 PVDF membrane. Primary antibodies were anti-GFP (Thermofisher). Anti-Rabbit IgG alkaline  
144 phosphatase conjugated secondary antibodies (Sigma Aldrich) were used. Blots were  
145 developed using CDP-Star (Roche) and chemiluminescence was detected using a Fujifilm LAS  
146 4000 imager (GE Healthcare).

147 *Bacterial two hybrids*

148 Bacterial two hybrids were performed using the BACTH system components (kindly provided  
149 by Fabian Commichau, Göttingen University). Sequences from *divIB*, *divIC*, *ftsL*, *pbpb* and  
150 *pbpbΔPASTA* were amplified from chromosomal DNA of *B. subtilis* 168. Primers contained  
151 *XbaI* and *KpnI* restriction sites (Table S1). Fragments were cloned into pKT25 and pUT18C  
152 using *XbaI* and *KpnI*. The resulting plasmids were sequence verified and co-transformed into  
153 *E. coli* BTH101. To test for protein interactions, the transformants were plated on LB agar  
154 plates containing X-gal (40 µg/ml), IPTG (0.5 mM), kanamycin (50 µg/ml) and ampicillin (100  
155 µg/ml). Plates were incubated at 30°C for 36 hrs and scored for blue color development. The  
156 β-Galactosidase assay was performed as described (20) with some modification. *E. coli*  
157 BTH101 containing the plasmids to test were grown as overnight cultures in LB containing  
158 IPTG (0.5 mM), kanamycin (50 µg/ml) and ampicillin (100 µg/ml) at 30°C. The next day 200  
159 µl of cells were transferred to a tube containing buffer Z. To permeabilize the cells 20 µl of  
160 0.01% SDS (w/v) and 40 µl of chloroform were added to each tube. After mixing, the  
161 chloroform was allowed to settle down and 50 µl of permeabilized cells were transferred to a  
162 96-well plate containing 150 µl of buffer Z. Then, 40 µl of 4% (w/v) o-nitrophenyl-β-D-  
163 galactopyranoside (ONPG) was added to start the enzymatic reaction. When the samples were  
164 yellow, the reaction time was recorded and reactions were stopped by adding 1M Na<sub>2</sub>CO<sub>3</sub> (final  
165 concentration). The absorbance at 420 nm and 550 nm was measured in a Powerwave 340  
166 (Biotek) and β-Galactosidase activity was calculated as:

167 
$$\text{Miller units} = 1000 * \frac{(\text{OD}_{420} - (1.75 * \text{OD}_{550}))}{T * V * \text{OD}_{600}}$$

168 T= Time in minutes; V= Volume in millilitres

169 *Co-Immunoprecipitation*

170 O/N cultures of strains 4174 and 4175 were diluted 1:100 and induced with 0.2% xylose (w/v)  
171 until OD<sub>600</sub> ≈ 0.4. CoIPs were performed essentially as described (21). Cells were harvested,

172 resuspended in buffer I (10 mM Tris-HCl, 150 mM NaCl, pH 7.4 with cOmplete™ ULTRA  
173 Tablets Mini EDTA-free, EASYpack protease inhibitors (Sigma-Aldrich)) and disrupted via  
174 sonication. Cell debris were removed by low-speed centrifugation and membranes were  
175 isolated through ultracentrifugation (100,000 x g, 1 h, 4°C) and solubilised with 1% (w/v) *n*-  
176 dodecyl-β-d-maltopyranoside (DDM; Anatrace) in buffer I by gentle shaking (4°C, 30 min).  
177 Solubilised material was recovered as the supernatant from a second ultracentrifugation step  
178 (100,000 x g, 30 min, 4°C). The protein concentration was determined with the DC™  
179 (detergent compatible) protein assay kit (Bio-Rad Laboratories) and 200 ng total membrane  
180 proteins were incubated for 1 h at 4°C with gentle shaking on a roller mix with either 25 μl  
181 GFP-Trap® agarose beads (Chromotek) in a final volume of 100 μl 1% (w/v) DDM buffer I,  
182 according to manufacturers' recommendations. Beads had been previously blocked by 1 h  
183 incubation with 1% (w/v) BSA in the corresponding buffer. After incubation, the flow-through  
184 fraction was collected (100 μl) using centrifugation (2,500 x g for 2 min) at 4°C and beads were  
185 washed twice and resuspended in 40 μl of 1xSDS-PAGE sample buffer. Low-binding tubes  
186 (Thermo Fisher Scientific) were used during the whole process. The input, flow-through and  
187 eluate fractions were analysed by SDS-PAGE and Western Blotting. Blots were developed  
188 using anti-FLAG M2 mouse monoclonal (Sigma-Aldrich, 1:1000) or anti-GFP pAb rabbit  
189 polyclonal (Chromotek, 1:1000) and appropriate Alkaline-phosphatase conjugated secondary  
190 antibodies. Blots were developed with CDP-Star (Roche), chemiluminescence was detected  
191 using a Fujifilm LAS4000 luminescence imager (GE Healthcare Life Science) and analysed  
192 using Image J ([rsb.info.nih.gov/ij/](http://rsb.info.nih.gov/ij/)).

193

194



195 **Results and Discussion**

196 *The absence of PBP2B PASTA domains results in a temperature sensitive phenotype.*

197 In a previous study, we created a series of strains expressing PBP2B variants from which the  
198 PASTA domains were removed and/or the active site Serine was mutated (Figure S1). As *pbpB*  
199 is an essential gene, we generated strains in which the expression of wild type *pbpB* is under  
200 control of IPTG with an extra copy of the *pbpB* variant (with/without PASTA, with/without  
201 *gfp*) inserted in the *amyE* locus under control of the  $P_{xyI}$  promoter. This strategy allows  
202 cultivation of the strains while expressing wild type *pbpB* followed by depletion of PBP2B and  
203 a switch to PBP2B variant production by the removal of IPTG and the addition of xylose, thus  
204 ensuring that the observed phenotype is not a product of a suppressor mutation. Previously, we  
205 showed that PBP2B- $\Delta$ PASTA was able to complement PBP2B depletion under standard  
206 conditions (CH-medium, 30°C), indicating that PASTA domains are not essential under  
207 standard conditions (7). However, we noted that the cells were slightly elongated, which we  
208 have now quantified. The strain producing PBP2B has an average length of 3.34  $\mu\text{m}$  ( $n=200$   
209 cells), while the strain producing PBP2B- $\Delta$ PASTA has an average length of 4.85  $\mu\text{m}$  ( $n=200$   
210 cells), which is  $\sim 1.5$  times longer (Figure 1, Table S2). In addition, there is more variation in  
211 the length distribution of the PBP2B- $\Delta$ PASTA producing strain as can be observed in the  
212 boxplot. When the temperature was increased to 37°C, the average length of the PBP2B-  
213  $\Delta$ PASTA strain increased to 5.20  $\mu\text{m}$  ( $n=200$  cells), whereas the strain expressing PBP2B  
214 ( $n=200$  cells) was slightly shorter than at 30°C (Figure 1, Table S2). We repeated this  
215 experiment in a defined minimal medium (SM medium) ( $n=200$  per strain) and noticed a  
216 similar elongated phenotype for the strain expressing PBP2B- $\Delta$ PASTA compared to the strain  
217 expressing PBP2B (Figure S2). At 37°C, cells grown on SM medium were overall shorter, but  
218 again, the strain expressing PBP2B- $\Delta$ PASTA displayed an elongated phenotype.

219 The increase in cell length is a characteristic phenotype indicative of a problem in cell division.  
220 To discard the possibility that the delay in cell division was a consequence of problems with  
221 chromosome segregation, DAPI was used to stain DNA. The PBP2B and PBP2B- $\Delta$ PASTA  
222 strains grown at 30°C and 37°C presented condensed nucleoids in all cells (Figure 1),  
223 indicating that chromosome segregation was not affected. Finally, strains expressing GFP-  
224 fusions to PBP2B and PBP2B- $\Delta$ PASTA, grown at 30°C, were scored for the presence of the  
225 GFP-PBP2B variant at the division site. GFP-PBP2B was present at the division site in 58.8%  
226 ( $\pm$  4.9%,  $n$ = 609) of the cells, whereas GFP-PBP2B- $\Delta$ PASTA was present at the division site  
227 in 38.8% ( $\pm$ 1.0%,  $n$ = 606) of the cells, again indicating that cell division is delayed/impaired  
228 when the PASTA domains are absent.

229 As we noticed that the elongation phenotype in CH-medium was more severe at 37°C than at  
230 30°C, the temperature was increased to 48°C. Surprisingly, the PBP2B- $\Delta$ PASTA strain did not  
231 grow at 48°C (Figure 2A). This result suggests that the PBP2B- $\Delta$ PASTA strain is temperature  
232 sensitive. We also noted that after prolonged incubation, the control depletion strain 3295,  
233 started growing (Figure 2A) – this also happened at lower temperatures and analysis of several  
234 depletion strains revealed that this is due to appearance of suppressor mutations in the promoter  
235 used to control *pbpB* (not shown). To get more insight into the effects of high temperature on  
236 the phenotype, the strains were grown under normal conditions (30°C, CH-medium) to make  
237 sure that the cells were growing healthy. Then, cultures were shifted to 48°C and pictures were  
238 taken every 20 minutes. The strain expressing PBP2B showed no drastic changes in the  
239 phenotype during the course of the experiment (Figure 2B). On the other hand, after 40 minutes  
240 the PBP2B- $\Delta$ PASTA strain started to display cells with decreased contrast, a characteristic of  
241 dying cells (Figure 2B). After 1 hour at 48°C, we observed that the amount of dying cells in  
242 the PBP2B- $\Delta$ PASTA strain culture increased. These observations confirm that the deletion of  
243 the PASTA domains from PBP2B confers a temperature sensitive phenotype.

244 *The PASTA domains of PBP2B are specific*

245 *B. subtilis* has two other proteins that contain PASTA domains, SpoVD and PrkC. SpoVD is a  
246 PBP paralogous of PBP2B. It is crucial for spore cortex synthesis and contains a single PASTA  
247 domain (22). PrkC is a eukaryotic-like serine/threonine kinase that is involved in processes like  
248 germination and biofilm formation, WalR activation and that localizes to the septum (14, 23,  
249 24). In order to test if the PASTA domains of SpoVD and PrkC were able to replace the  
250 function of the PASTA domains of PBP2B, the PBP2B PASTA domains were exchanged for  
251 PASTA domains from SpoVD or PrkC (Figure S1). Growth of the strains expressing the  
252 chimera proteins was followed at 30°C in CH-medium (Figure 3A), and was found to be similar  
253 to the background deletion strain. This indicates that the exchange of the PASTA domains did  
254 not interfere with the essential function of PBP2B. The cells expressing the chimera proteins  
255 were examined by microscopy which showed that the cells expressing the PBP2B-PASTA<sub>SpoVD</sub>  
256 chimera were similar sized to cells expressing PBP2B, whereas cells expressing the PBP2B-  
257 PASTA<sub>PrkC</sub> chimera were elongated, although not to the same extent as the PBP2B-ΔPASTA  
258 cells (Figure 3C, E, Table S2). GFP-fusions to the chimera proteins showed that both chimeras  
259 localize to division sites, as expected from the observation that the chimeras do not interfere  
260 with the essential function of PBP2B (Figure 3D). Subsequently, these strains were grown at  
261 48°C to see whether the chimeric proteins complemented the temperature sensitive phenotype.  
262 Although both chimeric proteins did allow some growth at 48°C, the lag phase of the cells was  
263 longer compared to the PBP2B strain and cells did not reach similar OD<sub>600</sub> values (Figure 3B).  
264 Again, the strain expressing the PBP2B-PASTA<sub>PrkC</sub> chimera was most affected. These results  
265 indicate that the PASTA domains from other *B. subtilis* proteins can partially complement the  
266 absence of the PBP2B PASTA domains.

267 *The PBP2B PASTA domains strengthen the interaction with DivIB*

268 A possible explanation for the temperature sensitive phenotype of the PBP2B- $\Delta$ PASTA strain  
269 is that the PBP2B- $\Delta$ PASTA protein becomes more labile at increased temperatures. However,  
270 an analysis of PBP2B and PBP2B- $\Delta$ PASTA stability at 30°C and 48°C revealed that although  
271 PBP2B is less stable at 48°C, both PBP2B and PBP2B- $\Delta$ PASTA are degraded at similar rates  
272 (Figure S3). We noted that the temperature sensitivity of the PBP2B- $\Delta$ PASTA strain was  
273 similar to the phenotype of a *divIB* deletion strain (25). DivIB (in other organisms FtsQ) is a  
274 divisome protein that interacts with DivIC (in other organisms FtsB) and FtsL and that  
275 regulates the turnover of FtsL and DivIC (26, 27). This turnover is regulated by PBP2B and  
276 the transpeptidase domain of PBP2B has been shown to interact with the C-terminus of DivIB  
277 (27, 28). We hypothesized that the absence of the PASTA domains from PBP2B might  
278 influence the interaction with DivIB and/or other proteins. To test this, we performed a  
279 bacterial two hybrid (BACTH) assay, in which we tested the ability of PBP2B and PBP2B-  
280  $\Delta$ PASTA to interact with DivIB, DivIC, FtsL, and itself. On plate, we confirmed the previous  
281 result from Daniel and colleagues (27) that PBP2B interacts with DivIB and FtsL, but not with  
282 DivIC and found no apparent difference between PBP2B and PBP2B- $\Delta$ PASTA (Figure 4A).  
283 Notably, we did not detect a PBP2B self-interaction. Also, we only found positive results when  
284 the PBP2B variants were expressed from the pKT25 plasmid (Figure S4) – this is probably due  
285 to the difference in copy numbers between the two plasmids used in the assay and not  
286 uncommon in BACTH screens of interactions between PBPs and other proteins (29). We also  
287 analysed the interactions using a  $\beta$ -galactosidase assay (Figure 4B), which has the added  
288 benefit of providing a quantitative result which can give a hint about the strength of the  
289 interaction. It has to be noted that the 'strength' of an interaction does not scale 1:1 with  $\beta$ -  
290 galactosidase activity and thus that changes in activity are only indicative of a change in  
291 interaction. The  $\beta$ -galactosidase assay confirmed the interactions of PBP2B with DivIB and  
292 FtsL, but in the absence of the PASTA domains the activity resulting from the interaction with

293 DivIB was roughly halved whereas the activity resulting from the interaction with FtsL was  
294 unchanged. This result suggests that the PASTA domains of PBP2B are not required for the  
295 interaction with DivIB, but that they do increase the strength of the interaction.

296 To validate the results from the BACTH experiments, co-immunoprecipitation experiments  
297 were performed. GFP-PBP2B and GFP-PBP2B- $\Delta$ PASTA were produced in a *B. subtilis* strain  
298 that produces a FLAG-tagged version of DivIB at the native locus under control of the wild  
299 type promoter (GP2005, a kind gift from Jörg Stülke). DivIB-FLAG is functional as the  
300 GP2005 strain is not thermosensitive (not shown). Anti-GFP nanobodies coupled to agarose  
301 (GFP-trap) were used to immunoprecipitate GFP-PBP2B and GFP-PBP2B- $\Delta$ PASTA and the  
302 immunoprecipitate was analysed by Western blot and detection using anti-FLAG and anti-GFP  
303 antibodies. The amount of DivIB-FLAG immunoprecipitated from cells producing GFP-  
304 PBP2B appeared significantly higher than that from cells producing GFP-PBP2B- $\Delta$ PASTA,  
305 although the overall recovery in both cases was low (Figure 4C). This was confirmed by  
306 quantification of the amount of immunoprecipitated DivIB-FLAG as a fraction of the total  
307 input in the sample (Figure 4D). Combined, the BACTH and co-immunoprecipitation results  
308 indicate that the PASTA domains of PBP2B strengthen the DivIB-PBP2B interaction.

309

### 310 **Concluding remarks**

311 In this paper we show that although the PASTA domains are not absolutely essential for the  
312 scaffolding role of PBP2B, they do become essential at elevated temperatures. This phenotype  
313 is similar to the phenotype described for a *divIB* deletion (25), suggesting the PASTA domains  
314 are involved in the same pathway. We could show that the PASTA domains are involved in  
315 the interaction between PBP2B and DivIB using both a BACTH and a coimmunoprecipitation  
316 approach. Earlier, King and colleagues identified an interaction between the C-terminal part of  
317 DivIB and the transpeptidase domain of PBP2B (28). In the modelled structure of PBP2B the

318 transpeptidase domain and the DivIB C-terminus are at similar distance from the membrane,  
319 but this is also the distance at which the PASTA domains can be found (28). It is possible that  
320 the PASTA domains strengthen the interaction between DivIB and the transpeptidase domain,  
321 but alternatively the PASTA domains interact with another region of DivIB. Our results show  
322 that PASTA domains can have distinct functions in similar proteins – whereas the PASTA  
323 domains in *S. pneumoniae* clearly function to allosterically activate the transpeptidase activity  
324 of the protein (12), their function in *B. subtilis* PBP2B is to stabilize an important protein-  
325 protein interaction in the divisome.

326

## 327 **Author Statements**

### Contributor Role

|                                      |                    |
|--------------------------------------|--------------------|
| Conceptualisation                    | DMA, DJS           |
| Methodology                          | DMA, AMV, LCB      |
| Validation                           | DMA, AMV, LCB      |
| Formal Analysis                      | DMA, AMV           |
| Investigation                        | DMA, AMV, LCB      |
| Writing – Original Draft Preparation | DMA, DJS           |
| Writing – Review and Editing         | DMA, AMV, LCB, DJS |
| Visualisation                        | DMA, AMV, DJS      |
| Supervision                          | DJS                |
| Project Administration               | DJS                |
| Funding                              | DJS                |

## 328 **Conflicts of interest**

329 The authors declare that there are no conflicts of interest.

330 **Funding information**

331 This work was partially supported by a VIDI fellowship (864.09.010) from the Netherlands  
332 Organisation for Scientific Research (NWO).

333 **Acknowledgements**

334 We would like to thank Fabian Commichau and Jörg Stülke (Göttingen University) for the kind  
335 gifts of the BACTH plasmids, and strain GP2005, respectively. We also thank Tal Shamia  
336 (Chromotek GmbH) for advice on the use of GFP-trap beads.

337

338 **References**

- 339 1. Monteiro JM, Pereira AR, Reichmann NT, Saraiva BM, Fernandes PB, Veiga H, et al.  
340 Peptidoglycan synthesis drives an FtsZ-treadmilling-independent step of cytokinesis. *Nature*.  
341 2018;554(7693):528-32.
- 342 2. den Blaauwen T, Hamoen LW, Levin PA. The divisome at 25: the road ahead. *Curr*  
343 *Opin Microbiol*. 2017;36:85-94.
- 344 3. Taguchi A, Welsh MA, Marmont LS, Lee W, Sjodt M, Kruse AC, et al. FtsW is a  
345 peptidoglycan polymerase that is functional only in complex with its cognate penicillin-  
346 binding protein. *Nat Microbiol*. 2019.
- 347 4. Zhao H, Patel V, Helmann JD, Dorr T. Don't let sleeping dogmas lie: new views of  
348 peptidoglycan synthesis and its regulation. *Mol Microbiol*. 2017;106(6):847-60.
- 349 5. Kobayashi K, Ehrlich SD, Albertini A, Amati G, Andersen KK, Arnaud M, et al.  
350 Essential *Bacillus subtilis* genes. *Proc Natl Acad Sci U S A*. 2003;100(8):4678-83.
- 351 6. Daniel RA, Williams AM, Errington J. A complex four-gene operon containing  
352 essential cell division gene *pbpB* in *Bacillus subtilis*. *J Bacteriol*. 1996;178(Journal  
353 Article):2343-50.
- 354 7. Morales Angeles D, Liu Y, Hartman AM, Borisova M, de Sousa Borges A, de Kok N,  
355 et al. Pentapeptide-rich peptidoglycan at the *Bacillus subtilis* cell-division site. *Mol*  
356 *Microbiol*. 2017;104(10.1111/mmi.13629):319-33.
- 357 8. Sassine J, Xu M, Sidiq KR, Emmins R, Errington J, Daniel RA. Functional  
358 redundancy of division specific penicillin-binding proteins in *Bacillus subtilis*. *Mol*  
359 *Microbiol*. 2017;106(2):304-18.
- 360 9. Peters K, Schweizer I, Beilharz K, Stahlmann C, Veening JW, Hakenbeck R, et al.  
361 *Streptococcus pneumoniae* PBP2x mid-cell localization requires the C-terminal PASTA  
362 domains and is essential for cell shape maintenance. *Mol Microbiol*. 2014;92(4):733-55.
- 363 10. Yeats C, Finn RD, Bateman A. The PASTA domain: a beta-lactam-binding domain.  
364 *Trends Biochem Sci*. 2002;27(9):438.
- 365 11. Maurer P, Todorova K, Sauerbier J, Hakenbeck R. Mutations in *Streptococcus*  
366 *pneumoniae* penicillin-binding protein 2x: importance of the C-terminal penicillin-binding  
367 protein and serine/threonine kinase-associated domains for beta-lactam binding. *Microb Drug*  
368 *Resist*. 2012;18(3):314-21.
- 369 12. Bernardo-Garcia N, Mahasanen KV, Batuecas MT, Lee M, Hesek D, Petrackova D, et  
370 al. Allostery, Recognition of Nascent Peptidoglycan, and Cross-linking of the Cell Wall by

371 the Essential Penicillin-Binding Protein 2x of *Streptococcus pneumoniae*. *ACS Chem Biol*.  
372 2018;13(3):694-702.

373 13. Calvanese L, Falcigno L, Squeglia F, D'Auria G, Berisio R. Structural and dynamic  
374 features of PASTA domains with different functional roles. *J Biomol Struct Dyn*.  
375 2017;35(10):2293-300.

376 14. Shah IM, Laaberki MH, Popham DL, Dworkin J. A eukaryotic-like Ser/Thr kinase  
377 signals bacteria to exit dormancy in response to peptidoglycan fragments. *Cell*.  
378 2008;135(3):486-96.

379 15. Squeglia F, Marchetti R, Ruggiero A, Lanzetta R, Marasco D, Dworkin J, et al.  
380 Chemical basis of peptidoglycan discrimination by PrkC, a key kinase involved in bacterial  
381 resuscitation from dormancy. *J Am Chem Soc*. 2011;133(51):20676-9.

382 16. Pensinger DA, Schaezner AJ, Sauer JD. Do Shoot the Messenger: PASTA Kinases as  
383 Virulence Determinants and Antibiotic Targets. *Trends Microbiol*. 2018;26(1):56-69.

384 17. Zucchini L, Mercy C, Garcia PS, Cluzel C, Gueguen-Chaignon V, Galisson F, et al.  
385 PASTA repeats of the protein kinase StkP interconnect cell constriction and separation of  
386 *Streptococcus pneumoniae*. *Nat Microbiol*. 2018;3(2):197-209.

387 18. Bond SR, Naus CC. RF-Cloning.org: an online tool for the design of restriction-free  
388 cloning projects. *Nucleic Acids Res*. 2012;40(Web Server issue):W209-13.

389 19. Syvertsson S, Vischer NO, Gao Y, Hamoen LW. When Phase Contrast Fails:  
390 ChainTracer and NucTracer, Two ImageJ Methods for Semi-Automated Single Cell Analysis  
391 Using Membrane or DNA Staining. *PLoS One*. 2016;11(3):e0151267.

392 20. Battesti A, Bouveret E. The bacterial two-hybrid system based on adenylate cyclase  
393 reconstitution in *Escherichia coli*. *Methods*. 2012;58(4):325-34.

394 21. Scheffers DJ, Robichon C, Haan GJ, den Blaauwen T, Koningstein G, van Bloois E,  
395 et al. Contribution of the FtsQ transmembrane segment to localization to the cell division site.  
396 *J Bacteriol*. 2007;189(20):7273-80.

397 22. Daniel RA, Drake S, Buchanan CE, Scholle R, Errington J. The *Bacillus subtilis*  
398 *spoVD* gene encodes a mother-cell-specific penicillin-binding protein required for spore  
399 morphogenesis. *Journal of Molecular Biology*. 1994;235(Journal Article):209-20.

400 23. Libby EA, Goss LA, Dworkin J. The Eukaryotic-Like Ser/Thr Kinase PrkC Regulates  
401 the Essential WalRK Two-Component System in *Bacillus subtilis*. *PLoS genetics*.  
402 2015;11(6):e1005275.

403 24. Pompeo F, Foulquier E, Serrano B, Grangeasse C, Galinier A. Phosphorylation of the  
404 cell division protein GpsB regulates PrkC kinase activity through a negative feedback loop in  
405 *Bacillus subtilis*. *Mol Microbiol*. 2015;97(1):139-50.

406 25. Beall B, Lutkenhaus J. Nucleotide sequence and insertional inactivation of a *Bacillus*  
407 *subtilis* gene that affects cell division, sporulation, and temperature sensitivity. *Journal of*  
408 *Bacteriology*. 1989;171(Journal Article):6821-34.

409 26. Daniel RA, Errington J. Intrinsic instability of the essential cell division protein FtsL  
410 of *Bacillus subtilis* and a role for DivIB protein in FtsL turnover. *Molecular Microbiology*.  
411 2000;36(Journal Article):278-89.

412 27. Daniel RA, Noirot-Gros MF, Noirot P, Errington J. Multiple interactions between the  
413 transmembrane division proteins of *Bacillus subtilis* and the role of FtsL instability in  
414 divisome assembly. *J Bacteriol*. 2006;188(21):7396-404.

415 28. Rowland SL, Wadsworth KD, Robson SA, Robichon C, Beckwith J, King GF.  
416 Evidence from artificial septal targeting and site-directed mutagenesis that residues in the  
417 extracytoplasmic beta domain of DivIB mediate its interaction with the divisomal  
418 transpeptidase PBP 2B. *Journal of Bacteriology*. 2010;192(23):6116-25.



- 419 29. Fenton AK, Manuse S, Flores-Kim J, Garcia PS, Mercy C, Grangeasse C, et al.  
 420 Phosphorylation-dependent activation of the cell wall synthase PBP2a in Streptococcus  
 421 pneumoniae by MacP. Proc Natl Acad Sci U S A. 2018;115(11):2812-7.  
 422 30. Hamoen LW, Errington J. Polar targeting of DivIVA in Bacillus subtilis is not  
 423 directly dependent on FtsZ or PBP 2B. J Bacteriol. 2003;185(2):693-7.  
 424 31. Karimova G, Pidoux J, Ullmann A, Ladant D. A bacterial two-hybrid system based on  
 425 a reconstituted signal transduction pathway. Proc Natl Acad Sci U S A. 1998;95(10):5752-6.  
 426

427

428 **Table 1. Strains**

| Strains                                    | Genetic features                                                                                                               | Source                |
|--------------------------------------------|--------------------------------------------------------------------------------------------------------------------------------|-----------------------|
| <b>Bacillus strains</b>                    |                                                                                                                                |                       |
| 168                                        | <i>trpC2</i>                                                                                                                   | Laboratory collection |
| 3295                                       | <i>trpC2 chr::P<sub>spac</sub>-pbpB neo</i>                                                                                    | (30)                  |
| 4132<br>( <i>gfp-pbpB</i> )                | <i>trpC2 chr::P<sub>spac</sub>-pbpB neo amyE::pDMA001(spc P<sub>xyl</sub>-gfpmut-pbpB)</i>                                     | (7)                   |
| 4133<br>( <i>gfp-pbpB ΔPASTA</i> )         | <i>trpC2 chr::P<sub>spac</sub>-pbpB neo amyE::pDMA002(spc P<sub>xyl</sub>-gfpmut-pbpB<sup>1-1991</sup>)</i>                    | (7)                   |
| 4137<br>( <i>pbpB</i> )                    | <i>trpC2 chr::P<sub>spac</sub>-pbpB neo amyE::pDMA006(spc P<sub>xyl</sub>-pbpB)</i>                                            | (7)                   |
| 4138<br>( <i>pbpB ΔPASTA</i> )             | <i>trpC2 chr::P<sub>spac</sub>-pbpB neo amyE::pDMA007(spc P<sub>xyl</sub>- pbpB<sup>1-1991</sup>)</i>                          | (7)                   |
| 4146<br>( <i>pbpB ΔPASTA-PrkC PASTA</i> )  | <i>trpC2 chr::P<sub>spac</sub>-pbpB neo amyE::pDMA011(spc P<sub>xyl</sub>-pbpB<sup>1-1991</sup> prkC<sup>1068-1677</sup>)</i>  | This work             |
| 4148<br>( <i>pbpB ΔPASTA-SpoVD PASTA</i> ) | <i>trpC2 chr::P<sub>spac</sub>-pbpB neo amyE::pDMA013(spc P<sub>xyl</sub>-pbpB<sup>1-1991</sup> spoVD<sup>1740-1890</sup>)</i> | This work             |
| 4174                                       | <i>divIB-3xFLAG ermC amyE::pDMA001(spc P<sub>xyl</sub>-gfpmut-pbpB)</i>                                                        | This work             |
| 4175                                       | <i>divIB-3xFLAG ermC amyE::pDMA002(spc P<sub>xyl</sub>-gfpmut-pbpB<sup>1-1991</sup>)</i>                                       | This work             |
| GP2005                                     | <i>divIB-3xFLAG ermC</i>                                                                                                       | Gift from Jörg Stülke |
| <b>E. coli strains</b>                     |                                                                                                                                |                       |
| DH5α                                       | F– <i>endA1 glnV44 thi-1 recA1 relA1 gyrA96 deoR nupG purB20 φ80dlacZΔM15 Δ(lacZYA-argF)U169, hsdR17(rK–mK+), λ–</i>           | Laboratory collection |
| BTH101                                     | F, <i>cya-99, araD139, galE15, galK16, rpsL1 (Strr), hsdR2, mcrA1, mcrB1.</i>                                                  | (31)                  |

429

430

431 **Table 2. Plasmids**

| Plasmid | Genetic features                                                                                     | Source    |
|---------|------------------------------------------------------------------------------------------------------|-----------|
| pDMA002 | <i>bla amyE3' spc P<sub>xyl</sub>-gfpmut1-pbpB<sup>1-1991</sup> - ' amyE5'</i>                       | (7)       |
| pDMA007 | <i>bla amyE3' spc P<sub>xyl</sub>- pbpB<sup>1-1991</sup> amyE5'</i>                                  | (7)       |
| pDMA011 | <i>bla amyE3' spc P<sub>xyl</sub>- pbpB<sup>1-1991</sup> prkC<sup>1068-1677</sup>' amyE5'</i>        | This work |
| pDMA012 | <i>bla amyE3' spc P<sub>xyl</sub>-gfpmut1 pbpB<sup>1-1991</sup> prkC<sup>1068-1677</sup>' amyE5'</i> | This work |
| pDMA013 | <i>bla amyE3' spc P<sub>xyl</sub>- pbpB<sup>1-1991</sup> spoVD<sup>1735-1916</sup>' amyE5'</i>       | This work |

|            |                                                                                                        |           |
|------------|--------------------------------------------------------------------------------------------------------|-----------|
| pDMA014    | <i>bla amyE3' spc P<sub>xyl</sub>-gfpmut1- pbpB<sup>1-1991</sup> spoVD<sup>1735-1916</sup>' amyE5'</i> | This work |
| pKT25      | Plasmid encoding T25 fragment of <i>B. pertussis cyaA</i> ; Km <sup>R</sup>                            | (31)      |
| pUT18C     | Modified version of pUT18 with the polylinker located on the C-terminal end of T18; Amp <sup>R</sup>   | (31)      |
| pKT25-zip  | Derivative of pKT25 with a leucine zipper of GCN4 fused to the T25 fragment, Km <sup>R</sup>           | (31)      |
| pUT18C-zip | Derivative of pUT18C with leucine zipper of GCN4 fused to the T18 fragment, Amp <sup>R</sup>           | (31)      |

432

### 433 **Figure legends**

434 **Figure 1. Phenotype of strains producing PBP2B and PBP2B-ΔPASTA.** A) Phase-contrast  
435 microscopy of the PBP2B and PBP2B-ΔPASTA strains. Cultures were grown on CH-medium  
436 at 30°C and 37°C until exponential phase. Membranes and DNA were labelled with Nile red  
437 (e-h) and DAPI (i-l), respectively. (a, e, i) PBP2B (strain 4137) 30 °C; (b, f, j) PBP2B-ΔPASTA  
438 (strain 4138) 30°C; (c, g, k) PBP2B 37°C; (d, h, l) PBP2B-ΔPASTA 37°C. Scale bar: 5 μm,  
439 same for all. B) Length distribution of cells. Cells were grown in CH-medium at 30 or 37°C  
440 until exponential phase. As *B. subtilis* forms chains, cells were labelled with Nile red in order  
441 to determine the boundaries of single cells. Length of cells was obtained by automated image  
442 analysis. The values obtained ( $n = 200$  per strain) are shown as box plots. White circles show  
443 the medians (PBP2B 30°C = 3.32 μm, PBP2B-ΔPASTA 30°C = 4.67 μm, PBP2B 37°C = 3.10  
444 μm, PBP2B-PASTA 37°C = 4.97 μm); box limits indicate the 25th and 75th percentiles as  
445 determined by R software; whiskers extend 1.5 times the interquartile range from the 25th and  
446 75th percentiles; polygons represent density estimates of data and extend to extreme values.

447

448 **Figure 2. The PBP2B-ΔPASTA strain is thermosensitive.** A) Growth curves in CH-medium  
449 at 48°C, OD<sub>600</sub> was measured every 10 min. (◆) CH-medium, control, (■) 168, (▲) 3295, (●)  
450 3295 no IPTG, (◇) PBP2B, (□) PBP2B-ΔPASTA. Representative results from three  
451 independent experiments are shown. All experiments were performed in triplicates. The  
452 resulting average and standard error are shown for each time point. B) Lysis of cells at 48°C.

453 Cells were grown at 30°C until early exponential phase, then cells were shifted to 48°C and  
454 followed by microscope every 20 minutes. White arrowheads indicate dead cells. Scale bar 5  
455  $\mu\text{m}$ . Representative results from three independent experiments are shown.

456

457 **Figure 3. Phenotype of strains expressing PBP2B PASTA chimeras.** Growth curves in CH-  
458 medium at 30°C (A) and at 48°C (B), OD<sub>600</sub> was measured every 10 min. (◆) CH-medium,  
459 control, (■) 168, (▲) 3295, (●) 3295 no IPTG, (◇) PBP2B-PASTA<sub>PrkC</sub>, (Δ) PBP2B-  
460 PASTA<sub>SpoVD</sub>. Representative results from three independent experiments are shown. All  
461 experiments were performed in triplicates. The resulting average and standard error are shown  
462 for each time point. C) Cells expressing PBP2B-PASTA<sub>SpoVD</sub> and PBP2B-PASTA<sub>PrkC</sub> were  
463 grown at 30°C in CH- medium until exponential phase, imaged with phase-contrast and labeled  
464 with Nile-red. Red. Representative results from three independent experiments are shown.  
465 Scale bar: 5  $\mu\text{m}$ . D) Cells producing GFP-PBP2B-PASTA<sub>SpoVD</sub> and GFP-PBP2B-PASTA<sub>PrkC</sub>,  
466 imaged with phase-contrast and for GFP-fluorescence. Scale bar: 5  $\mu\text{m}$ . E) Length distribution  
467 of cells producing PBP2B-PASTA<sub>SpoVD</sub> and PBP2B-PASTA<sub>PrkC</sub> chimeras. Cells were grown  
468 in CH-medium at 30°C until exponential phase and pictures were taken. Length of cells was  
469 obtained by automated image analysis. The values obtained ( $n = 200$  per strain) are shown as  
470 box plots. White circles show the medians medians (PBP2B-SpoVD = 3.46  $\mu\text{m}$ , PBP2B-PrkC=  
471 4.30  $\mu\text{m}$ ); box limits indicate the 25th and 75th percentiles as determined by R software;  
472 whiskers extend 1.5 times the interquartile range from the 25th and 75th percentiles; polygons  
473 represent density estimates of data and extend to extreme values.

474

475 **Figure 4. The interaction between PBP2B and DivIB is diminished in the absence of the**  
476 **PASTA domains.** A, B) BACTH assay. A) Interaction assay on plates containing X-Gal.  
477 PBP2B, PBP2B $\Delta$ -PASTA, DivIB, DivIC and FtsL were cloned into plasmids pKT25 and

478 pUT18C and co-transformed into *E. coli* BTH101. Co-transformants were grown on LB plates  
479 containing X-Gal and incubated at 30°C for 36 hrs. Blue colonies are considered indicative of  
480 protein-protein interaction. PBP2B and PBP2B  $\Delta$ PASTA were used as bait in pKT25, while  
481 prey proteins were expressed in pUT18C. Positive control: transformants containing pKT25-  
482 zip and pUT18C-zip; negative control: transformants containing empty pKT25 and pUT18.  
483 Representative results from three independent experiments are shown. B)  $\beta$ -galactosidase  
484 assay. Interaction between PBP2B and PBP2B- $\Delta$ PASTA cloned into pKT25 in combination  
485 with the late division protein cloned into pUT18C. The positive control showed an activity of  
486 63278 Miller units and the negative control 66 (shown as dotted line). Note the different scales  
487 on the left and right y-axes and the discontinued x-axis. Representative results from three  
488 independent experiments are shown. All experiments were performed in triplicates. The  
489 resulting average and standard error are shown for each interaction. C, D) Co-  
490 immunoprecipitation assay. C) Western blot of a co-Immunoprecipitation experiment.  
491 Solubilised membranes from strains producing DivIB-FLAG and GFP-PBP2B (4174) or GFP-  
492 PBP2B- $\Delta$ PASTA were immunoprecipitated using GFP-Trap agarose beads. Input (In), flow-  
493 through (FT) and eluted (coIP) material was analysed by SDS-PAGE/Western Blot and the  
494 blot was simultaneously developed using anti-FLAG and anti-GFP antibodies. D)  
495 Quantification of the fraction of DivIB-FLAG co-immunoprecipitated with either GFP-PBP2B  
496 or GFP-PBP2B- $\Delta$ PASTA, expressed as the ratio of the signal of DivIB-FLAG in the coIP  
497 fraction to the signal of DivIB-FLAG in the input sample. Bar shows the mean of 4 independent  
498 experiments with standard deviations.  
499

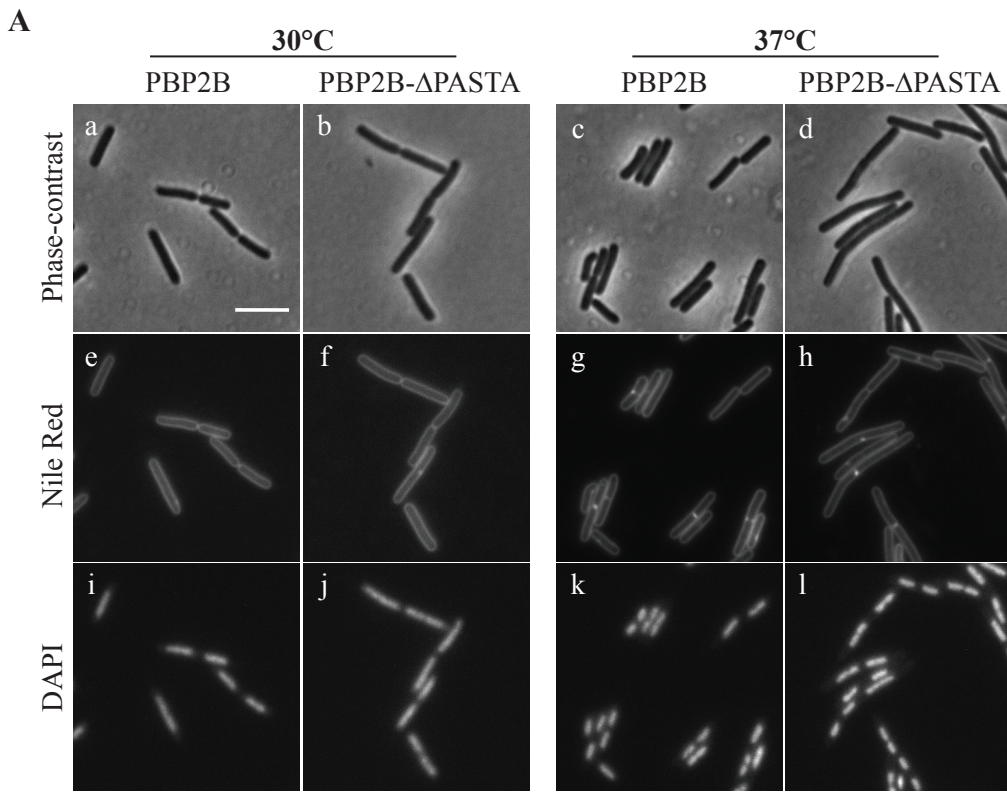

**B**

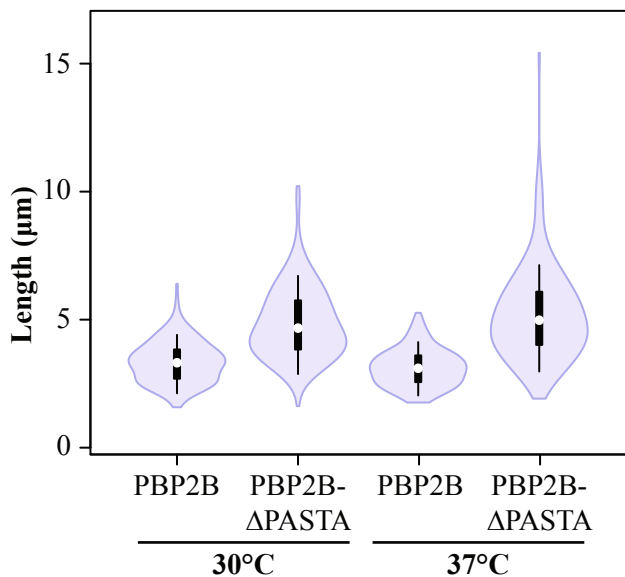

Figure 1. Phenotype of strains producing PBP2B and PBP2B- $\Delta$ PASTA. A) Phase-contrast microscopy of the PBP2B and PBP2B- $\Delta$ PASTA strains. Cultures were grown on CH-medium at 30°C and 37°C until exponential phase. Membranes and DNA were labelled with Nile red (e-h) and DAPI (i-l), respectively. (a, e, i) PBP2B (strain 4137) 30 °C; (b, f, j) PBP2B- $\Delta$ PASTA (strain 4138) 30°C; (c, g, k) PBP2B 37°C; (d, h, l) PBP2B- $\Delta$ PASTA 37°C. Scale bar: 5  $\mu$ m, same for all. B) Length distribution of cells. Cells were grown in CH-medium at 30 or 37°C until exponential phase. As *B. subtilis* forms chains, cells were labelled with Nile red in order to determine the boundaries of single cells. Length of cells was obtained by automated image analysis. The values obtained (n = 200 per strain) are shown as box plots. White circles show the medians (PBP2B 30°C = 3.32  $\mu$ m, PBP2B- $\Delta$ PASTA 30°C = 4.67  $\mu$ m, PBP2B 37°C = 3.10  $\mu$ m, PBP2B- $\Delta$ PASTA 37°C = 4.97  $\mu$ m); box limits indicate the 25th and 75th percentiles as determined by R software; whiskers extend 1.5 times the interquartile range from the 25th and 75th percentiles; polygons represent density estimates of data and extend to extreme values.

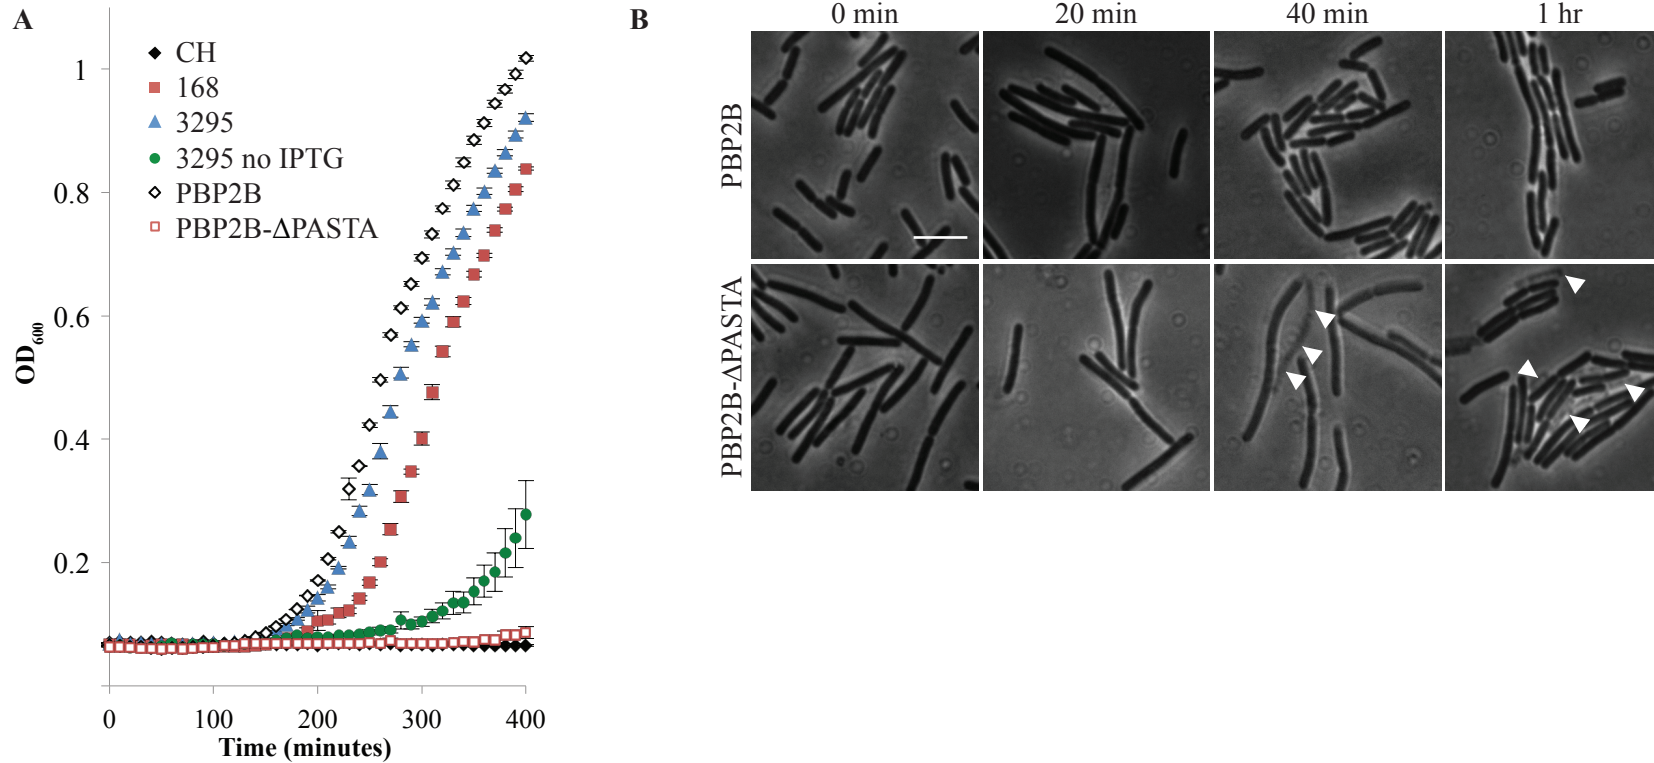

Figure 2. The PBP2B- $\Delta$ PASTA strain is thermosensitive. A) Growth curves in CH-medium at 48°C, OD600 was measured every 10 min. (◆) CH-medium, control, (■)168, (▲) 3295, (●) 3295 no IPTG, (◇) PBP2B, (□) PBP2B- $\Delta$ PASTA. Representative results from three independent experiments are shown. All experiments were performed in triplicates. The resulting average and standard error are shown for each time point. B) Lysis of cells at 48°C. Cells were grown at 30°C until early exponential phase, then cells were shifted to 48°C and followed by microscope every 20 minutes. White arrowheads indicate dead cells. Scale bar 5  $\mu$ m. Representative results from three independent experiments are shown.

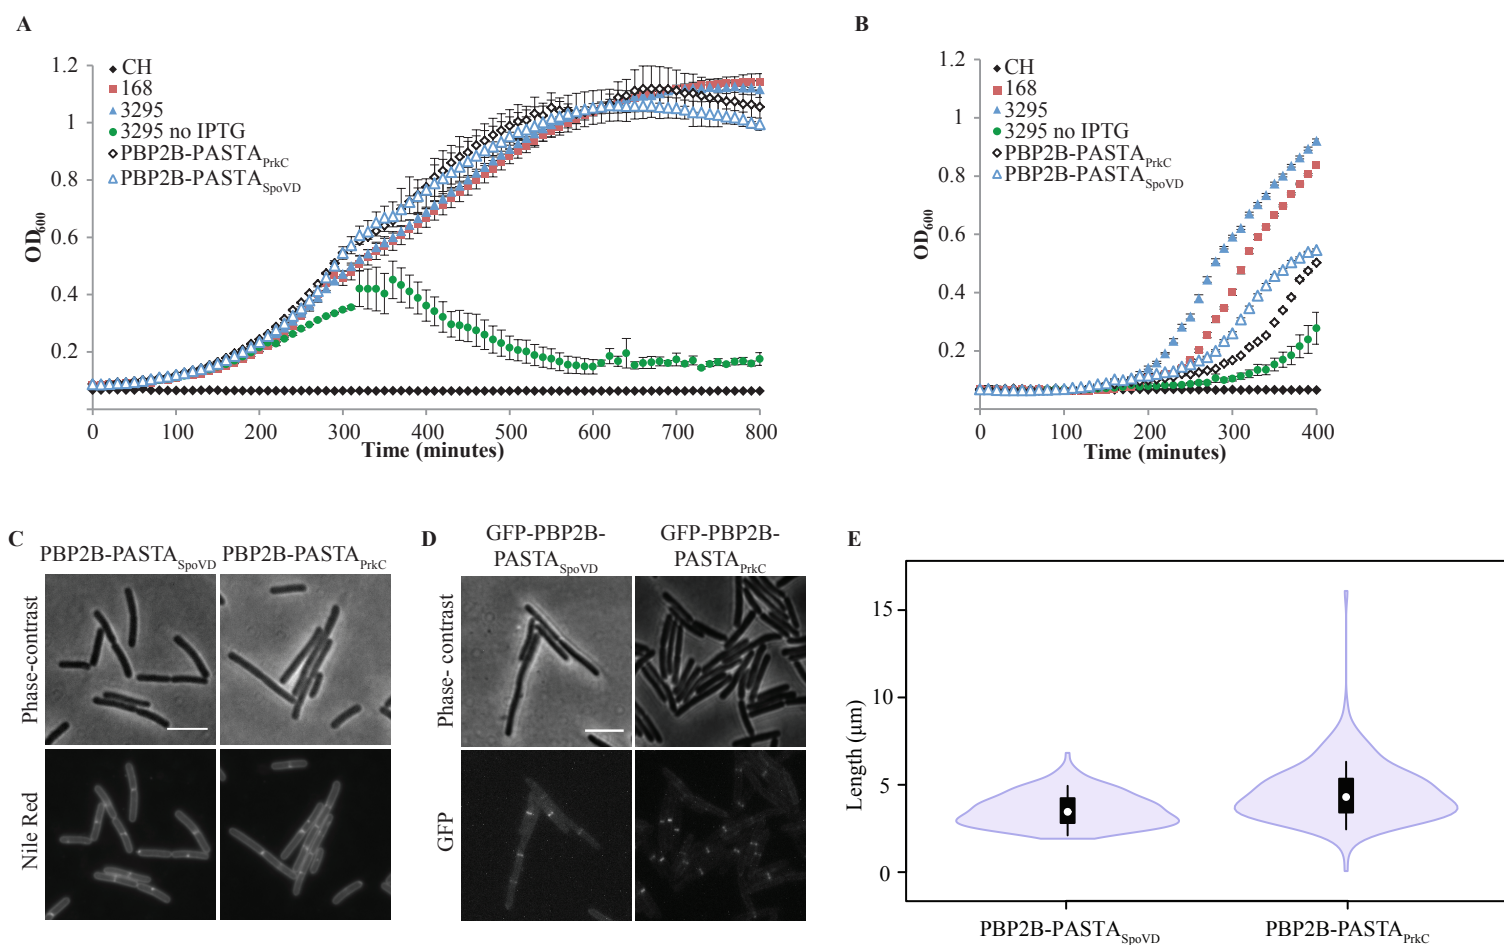

Figure 3. Phenotype of strains expressing PBP2B PASTA chimeras. Growth curves in CH-medium at 30°C (A) and at 48°C (B), OD<sub>600</sub> was measured every 10 min. (◆) CH-medium, control, (■) 168, (▲) 3295, (●) 3295 no IPTG, (◇) PBP2B-PASTA<sub>PrkC</sub>, (△) PBP2B-PASTA<sub>SpoVD</sub>. Representative results from three independent experiments are shown. All experiments were performed in triplicates. The resulting average and standard error are shown for each time point. C) Cells expressing PBP2B-PASTA<sub>SpoVD</sub> and PBP2B-PASTA<sub>PrkC</sub> were grown at 30°C in CH- medium until exponential phase, imaged with phase-contrast and labeled with Nile-red. Red. Representative results from three independent experiments are shown. Scale bar: 5 µm D) Cells producing GFP-PBP2B-PASTA<sub>SpoVD</sub> and GFP-PBP2B-PASTA<sub>PrkC</sub>, imaged with phase-contrast and for GFP-fluorescence. Scale bar: 5 µm. E) Length distribution of cells producing PBP2B-PASTA<sub>SpoVD</sub> and PBP2B-PASTA<sub>PrkC</sub> chimeras. Cells were grown in CH-medium at 30°C until exponential phase and pictures were taken. Length of cells was obtained by automated image analysis. The values obtained (n = 200 per strain) are shown as box plots. White circles show the medians medians (PBP2B-SpoVD = 3.46 µm, PBP2B-PrkC= 4.30 µm); box limits indicate the 25th and 75th percentiles as determined by R software; whiskers extend 1.5 times the interquartile range from the 25th and 75th percentiles; polygons represent density estimates of data and extend to extreme values.



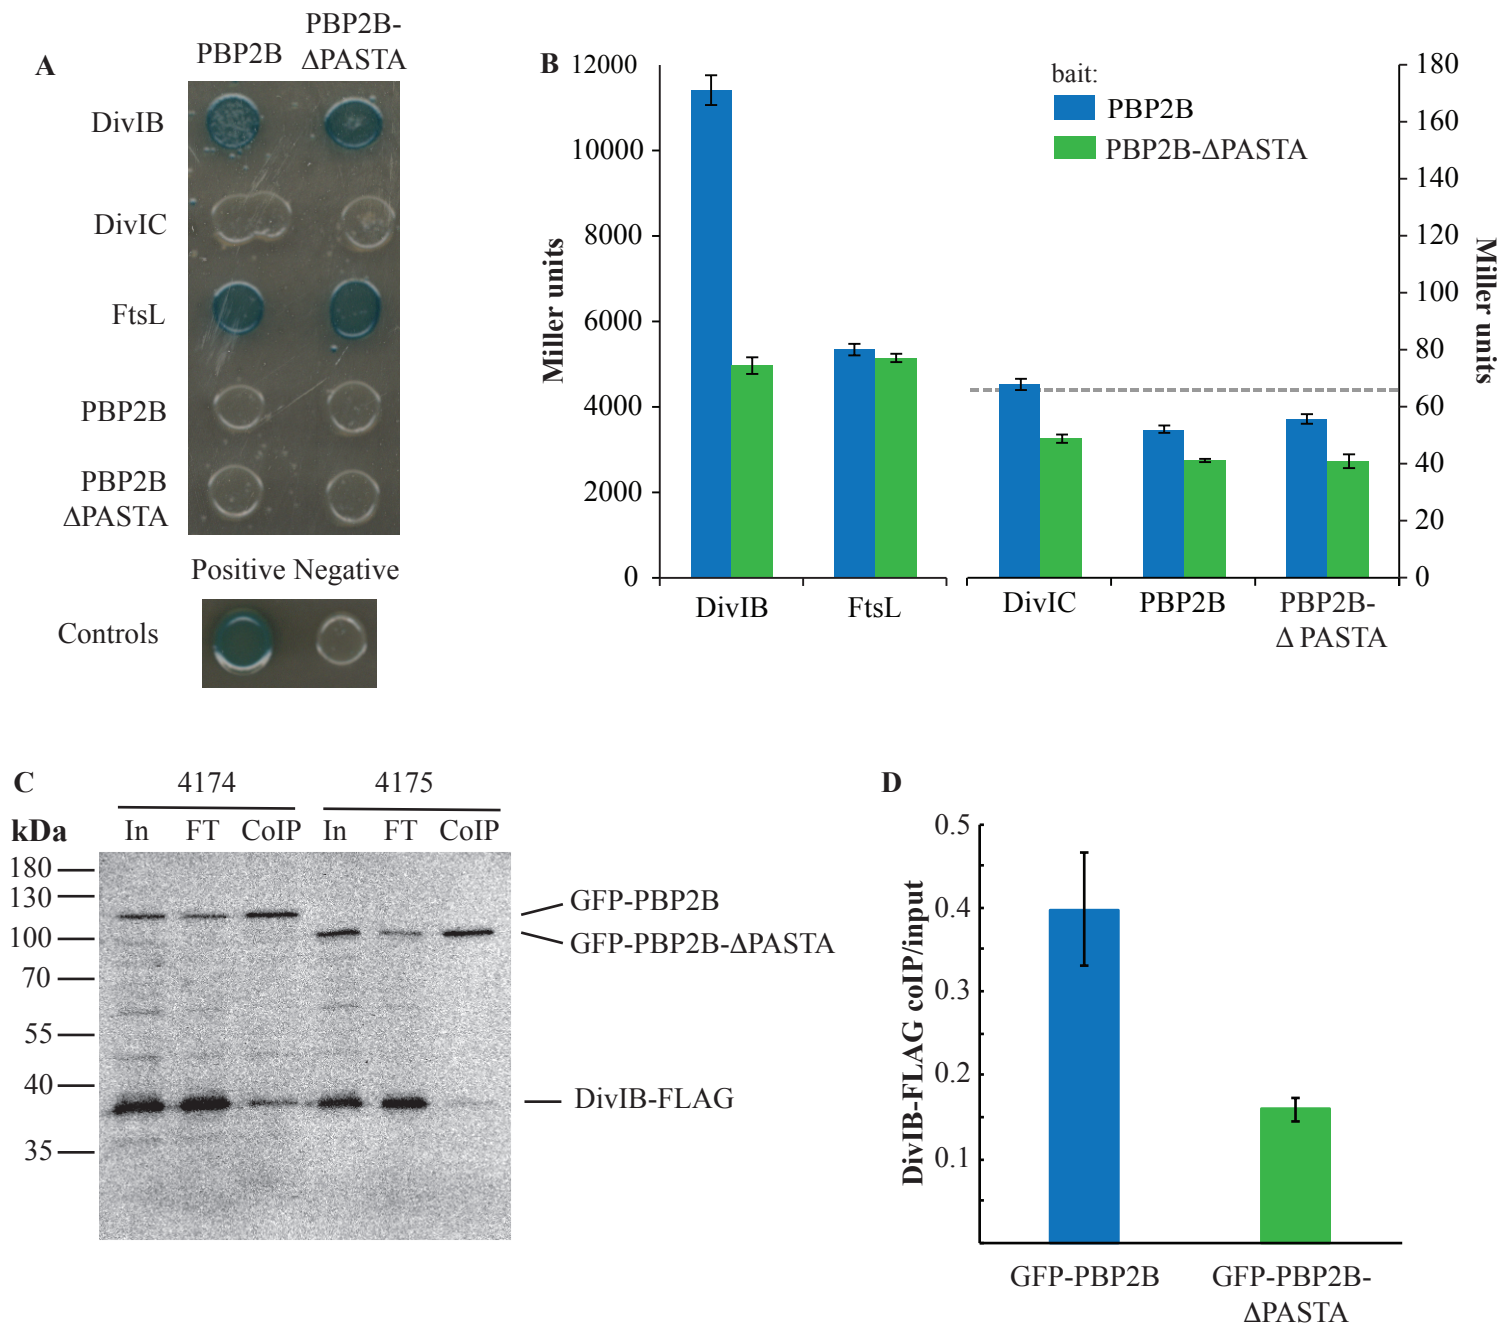

Figure 4. The interaction between PBP2B and DivIB is diminished in the absence of the PASTA domains. A, B) BACTH assay. A) Interaction assay on plates containing X-Gal. PBP2B, PBP2B $\Delta$ -PASTA, DivIB, DivIC and FtsL were cloned into plasmids pKT25 and pUT18C and co-transformed into *E. coli* BTH101. Co-transformants were grown on LB plates containing X-Gal and incubated at 30°C for 36 hrs. Blue colonies are considered indicative of protein-protein interaction. PBP2B and PBP2B  $\Delta$ PASTA were used as bait in pKT25, while prey proteins were expressed in pUT18C. Positive control: transformants containing pKT25-zip and pUT18C-zip; negative control: transformants containing empty pKT25 and pUT18. Representative results from three independent experiments are shown. B)  $\beta$ -galactosidase assay. Interaction between PBP2B and PBP2B- $\Delta$ PASTA cloned into pKT25 in combination with the late division protein cloned into pUT18C. The positive control showed an activity of 63278 Miller units and the negative control 66 (shown as dotted line). Note the different scales on the left and right y-axes and the discontinued x-axis. Representative results from three independent experiments are shown. All experiments were performed in triplicates. The resulting average and standard error are shown for each interaction. C, D) Co-immunoprecipitation assay. C) Western blot of a co-immunoprecipitation experiment. Solubilised membranes from strains producing DivIB-FLAG and GFP-PBP2B (4174) or GFP-PBP2B- $\Delta$ PASTA were immunoprecipitated using GFP-Trap agarose beads. Input (In), flow-through (FT) and eluted (coIP) material was analysed by SDS-PAGE/Western Blot and the blot was simultaneously developed using anti-FLAG and anti-GFP antibodies. D) Quantification of the fraction of DivIB-FLAG co-immunoprecipitated with either GFP-PBP2B or GFP-PBP2B- $\Delta$ PASTA, expressed as the ratio of the signal of DivIB-FLAG in the coIP fraction to the signal of DivIB-FLAG in the input sample. Bar shows the mean of 4 independent experiments with standard deviations.
